# Supplementary material for: Interaction between Negatively Charged Fish Gelatin and Cyclodextrin in Aqueous Solution: Characteristics and Formation Mechanism
Source: MDPI journal article supplement (doi:10.3390/gels7040260), 2021-12-13
Supplement: s1 [file s1]

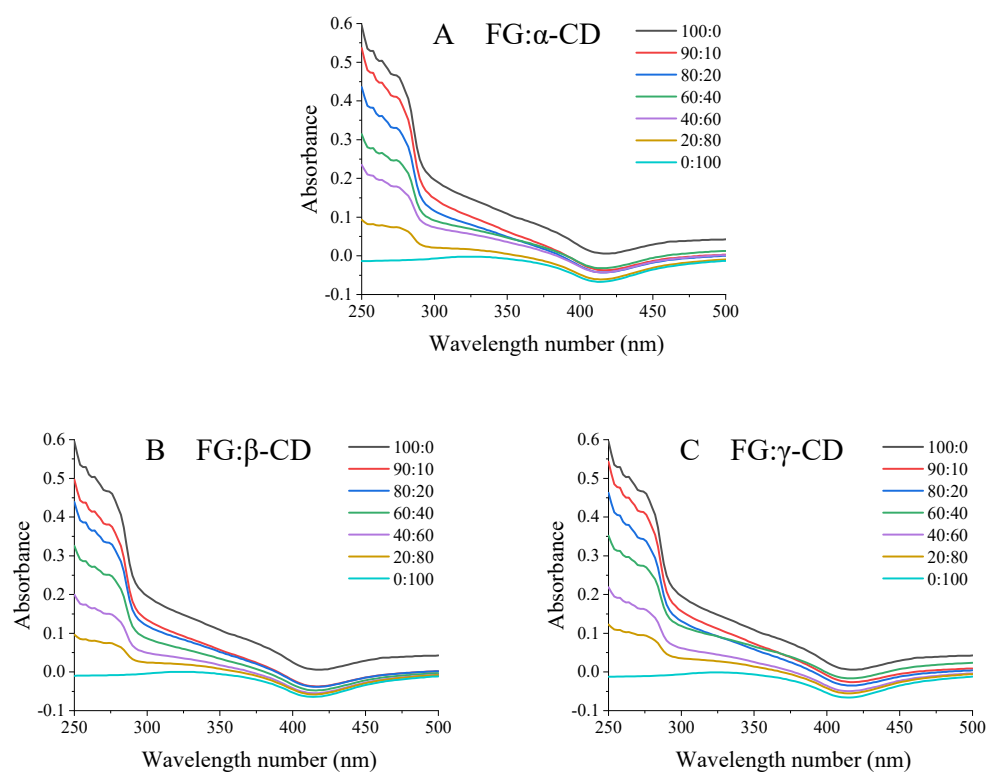

**Figure S1.** UV absorbance spectra of various FG-CD systems

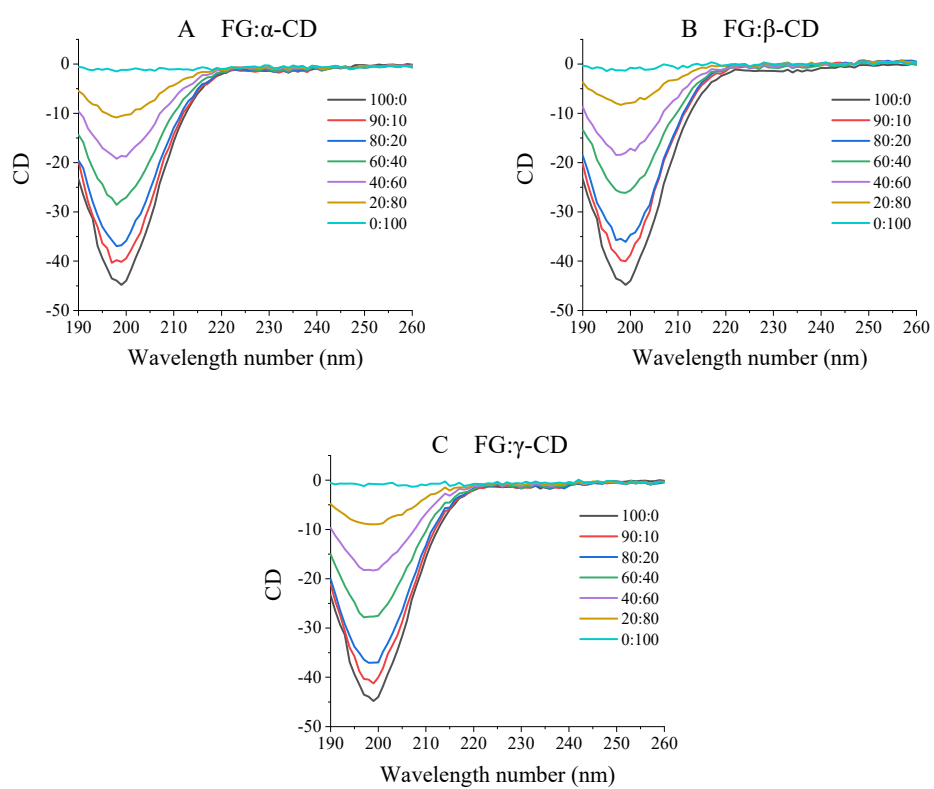

**Figure S2.** CD spectra of various FG-CD systems

**Table S1.** Flow behavior of various FG-CD systems

|                    | Various ratios     | $\eta_{50}$<br>(mPa· s) | Power low |                   |      | Bingham |                |                   | Herschel-Bulkley |                |                   | Cross |       |                   |       |
|--------------------|--------------------|-------------------------|-----------|-------------------|------|---------|----------------|-------------------|------------------|----------------|-------------------|-------|-------|-------------------|-------|
|                    |                    |                         | RMSE      | $\kappa$ (mPa· s) | n    | RMSE    | $\tau_0$ (mPa) | $\eta_0$ (mPa· s) | RMSE             | $\tau_0$ (mPa) | $\kappa$ (mPa· s) | n     | RMSE  | $\eta_0$ (mPa· s) | m     |
| FG:<br>$\alpha$ CD | 100:0              | 0.15±0.01               | 0.152     | 0.16              | 0.98 | 0.296   | 0.127          | 0.144             | 0.151            | -0.015         | 0.16              | 0.98  | 0.039 | 0.056             | 1.013 |
|                    | 90:10              | 0.17±0.00               | 0.150     | 0.19              | 0.98 | 0.456   | 0.232          | 0.164             | 0.150            | -0.010         | 0.19              | 0.98  | 0.039 | 0.061             | 1.001 |
|                    | 80:20              | 0.28±0.01               | 0.442     | 0.33              | 0.98 | 0.871   | 0.305          | 0.282             | 0.431            | -0.120         | 0.33              | 0.98  | 0.085 | 0.086             | 1.018 |
|                    | 60:40              | 0.17±0.07               | 0.234     | 0.19              | 0.98 | 0.455   | 0.154          | 0.166             | 0.228            | -0.067         | 0.19              | 0.98  | 0.038 | 0.043             | 1.017 |
|                    | 40:60              | 0.26±0.00               | 0.370     | 0.29              | 0.98 | 0.786   | 0.284          | 0.249             | 0.359            | -0.110         | 0.30              | 0.97  | 0.065 | 0.063             | 1.015 |
|                    | 20:80              | 0.25±0.07               | 0.407     | 0.29              | 0.98 | 0.763   | 0.245          | 0.246             | 0.395            | -0.122         | 0.29              | 0.98  | 0.070 | 0.068             | 1.021 |
|                    | 0:100              | 0.17±0.03               | 0.254     | 0.20              | 0.97 | 0.596   | 0.232          | 0.167             | 0.246            | -0.074         | 0.20              | 0.97  | 0.042 | 0.045             | 1.011 |
| FG:<br>$\beta$ CD  | 90:10              | 0.12±0.05               | 0.384     | 0.05              | 0.99 | 1.088   | -0.282         | 0.095             | 0.310            | 0.273          | 0.046             | 0.99  | 0.320 | 0.279             | 1.112 |
|                    | 80:20              | 0.07±0.04               | 0.197     | 0.04              | 0.98 | 0.316   | -0.019         | 0.070             | 0.167            | 0.013          | 0.04              | 0.99  | 0.177 | 0.134             | 1.041 |
|                    | 60:40              | 0.03±0.01               | 0.608     | 0.09              | 0.86 | 0.903   | 0.292          | 0.036             | 0.601            | -0.119         | 0.10              | 0.85  | 0.306 | 0.155             | 1.247 |
|                    | 40:60              | 0.05±0.01               | 0.136     | 0.06              | 0.97 | 0.204   | 0.079          | 0.047             | 0.136            | -0.007         | 0.06              | 0.97  | 0.077 | 0.049             | 1.039 |
|                    | 20:80              | 0.04±0.01               | 0.589     | 0.08              | 0.86 | 0.848   | 0.224          | 0.034             | 0.578            | -0.140         | 0.09              | 0.85  | 0.278 | 0.111             | 1.272 |
|                    | 0:100              | 0.03±0.01               | 0.327     | 0.11              | 0.97 | 0.739   | -0.165         | 0.146             | 0.279            | 0.209          | 0.11              | 0.97  | 0.300 | 0.225             | 1.051 |
|                    | FG:<br>$\gamma$ CD | 90:10                   | 0.10±0.02 | 0.074             | 0.07 | 0.99    | 0.070          | 0.037             | 0.068            | 0.069          | 0.032             | 0.07  | 0.99  | 0.041             | 0.059 |
| 80:20              |                    | 0.12±0.01               | 0.498     | 0.07              | 0.98 | 1.550   | -0.479         | 0.133             | 0.426            | 0.326          | 0.07              | 0.98  | 0.441 | 0.320             | 1.114 |
| 60:40              |                    | 0.13±0.01               | 0.168     | 0.14              | 0.98 | 0.372   | 0.150          | 0.122             | 0.165            | -0.037         | 0.14              | 0.98  | 0.032 | 0.042             | 1.013 |
| 40:60              |                    | 0.11±0.01               | 0.248     | 0.13              | 0.98 | 0.393   | 0.136          | 0.109             | 0.246            | -0.036         | 0.13              | 0.97  | 0.126 | 0.068             | 1.030 |
| 20:80              |                    | 0.11±0.01               | 0.035     | 0.12              | 0.99 | 0.161   | 0.094          | 0.111             | 0.035            | 0.006          | 0.12              | 0.99  | 0.035 | 0.024             | 0.997 |
| 0:100              |                    | 0.11±0.03               | 0.064     | 0.11              | 0.99 | 0.094   | 0.056          | 0.108             | 0.063            | 0.017          | 0.11              | 0.99  | 0.027 | 0.044             | 1.009 |

**Table S2.** Fluorescence peak values of various FG-CD systems and FG contents

|        | 100:0                       | 90:10                        | 80:20                       | 60:40                       | 40:60                       | 20:80                        |
|--------|-----------------------------|------------------------------|-----------------------------|-----------------------------|-----------------------------|------------------------------|
| FG     | 4770.00±36.17 <sup>Af</sup> | 4527.67±13.65 <sup>Ae</sup>  | 4355.33±11.59 <sup>Ad</sup> | 4017.00±22.52 <sup>Ac</sup> | 3093.67±16.65 <sup>Ab</sup> | 1908.33±3.51 <sup>Aa</sup>   |
| FG:αCD | 4770.00±36.17 <sup>Ae</sup> | 4811.33±24.17 <sup>Cef</sup> | 4694.67±35.02 <sup>Cd</sup> | 4147.67±18.61 <sup>Cc</sup> | 3162.67±10.02 <sup>Bb</sup> | 1927.67±23.25 <sup>ABa</sup> |
| FG:βCD | 4770.00±36.17 <sup>Ae</sup> | 4853.67±8.74 <sup>Df</sup>   | 4808.00±32.79 <sup>Dd</sup> | 4421.67±22.59 <sup>Dc</sup> | 3523.00±14.00 <sup>Db</sup> | 2178.67±11.59 <sup>Ca</sup>  |
| FG:γCD | 4770.00±36.17 <sup>Af</sup> | 4642.00±12.12 <sup>Be</sup>  | 4606.33±7.23 <sup>Bd</sup>  | 4085.33±10.11 <sup>Bc</sup> | 3199.00±12.12 <sup>Cb</sup> | 1960.33±10.50 <sup>Ba</sup>  |

The values are mean ± SD, calculated from triplicate measurements. Values with different letters in the

same column (A-D) and same line (a-f) are significantly different at  $p < 0.05$

**Table S3.** FTIR Amide bands of various FG-CD systems

|                 | Various ratios | Amide I | Amide II | Amide III | Amide A | Amide B |
|-----------------|----------------|---------|----------|-----------|---------|---------|
| FG: $\alpha$ CD | 100:0          | 1655.59 | 1548.56  | 1240.00   | 3326.61 | 2958.27 |
|                 | 90:10          | 1655.59 | 1548.59  | 1240.00   | 3328.71 | 2938.98 |
|                 | 80:20          | 1655.59 | 1549.52  | 1240.00   | 3330.61 | 2938.02 |
|                 | 60:40          | 1656.55 | 1550.49  | 1241.93   | 3332.39 | 2935.13 |
|                 | 40:60          | 1658.48 | 1550.49  | 1241.93   | 3345.89 | 2933.20 |
|                 | 20:80          | 1656.55 | 1551.45  | 1242.90   | 3347.82 | 2931.27 |
|                 | 0:100          | 1640.16 | -        | 1241.93   | 3367.10 | 2930.31 |
| FG: $\beta$ CD  | 90:10          | 1657.52 | 1541.81  | 1240.00   | 3336.25 | 2954.41 |
|                 | 80:20          | 1657.52 | 1541.81  | 1240.97   | 3355.53 | 2936.09 |
|                 | 60:40          | 1657.52 | 1542.77  | 1240.97   | 3342.03 | 2935.13 |
|                 | 40:60          | 1658.48 | 1542.77  | 1242.90   | 3359.39 | 2929.34 |
|                 | 20:80          | 1649.80 | 1543.74  | 1243.86   | 3376.75 | 2927.41 |
|                 | 0:100          | 1650.77 | -        | 1245.79   | 3359.39 | 2923.56 |
| FG: $\gamma$ CD | 90:10          | 1656.55 | 1543.74  | 1240.00   | 3327.57 | 2941.88 |
|                 | 80:20          | 1657.52 | 1542.77  | 1240.97   | 3328.53 | 2938.02 |
|                 | 60:40          | 1657.52 | 1541.81  | 1240.97   | 3339.14 | 2936.09 |
|                 | 40:60          | 1658.48 | 1541.81  | 1241.93   | 3338.18 | 2934.16 |
|                 | 20:80          | 1657.52 | 1542.77  | 1242.90   | 3376.75 | 2932.23 |
|                 | 0:100          | 1657.52 | -        | 1241.93   | 3389.28 | 2932.23 |

**Table S4.** Secondary structure analysis of various FG-CD systems by FTIR

| Various ratios  |       | $\beta$ -sheet                 | Random coil                    | $\alpha$ -helix               | $\beta$ -turn                  |
|-----------------|-------|--------------------------------|--------------------------------|-------------------------------|--------------------------------|
| FG: $\alpha$ CD | 100:0 | 31.96 $\pm$ 0.31 <sup>bc</sup> | 18.28 $\pm$ 0.56 <sup>ab</sup> | 9.65 $\pm$ 0.12 <sup>a</sup>  | 40.11 $\pm$ 0.30 <sup>a</sup>  |
|                 | 90:10 | 31.34 $\pm$ 0.14 <sup>a</sup>  | 18.48 $\pm$ 0.23 <sup>ab</sup> | 9.92 $\pm$ 0.12 <sup>bc</sup> | 40.26 $\pm$ 0.26 <sup>ab</sup> |
|                 | 80:20 | 31.76 $\pm$ 0.13 <sup>b</sup>  | 18.21 $\pm$ 0.01 <sup>a</sup>  | 9.80 $\pm$ 0.07 <sup>ab</sup> | 40.24 $\pm$ 0.08 <sup>a</sup>  |
| FG: $\beta$ CD  | 100:0 | 31.96 $\pm$ 0.31 <sup>bc</sup> | 18.28 $\pm$ 0.56 <sup>ab</sup> | 9.65 $\pm$ 0.12 <sup>a</sup>  | 40.11 $\pm$ 0.30 <sup>c</sup>  |
|                 | 90:10 | 31.69 $\pm$ 1.22 <sup>b</sup>  | 18.01 $\pm$ 0.47 <sup>a</sup>  | 12.81 $\pm$ 0.45 <sup>c</sup> | 37.49 $\pm$ 0.14 <sup>a</sup>  |
|                 | 80:20 | 30.12 $\pm$ 1.25 <sup>a</sup>  | 19.52 $\pm$ 0.91 <sup>bc</sup> | 12.23 $\pm$ 0.05 <sup>b</sup> | 38.14 $\pm$ 0.40 <sup>b</sup>  |
| FG: $\gamma$ CD | 100:0 | 31.96 $\pm$ 0.31 <sup>a</sup>  | 18.28 $\pm$ 0.56 <sup>b</sup>  | 9.65 $\pm$ 0.12 <sup>a</sup>  | 40.11 $\pm$ 0.30 <sup>c</sup>  |
|                 | 90:10 | 36.95 $\pm$ 0.05 <sup>c</sup>  | 12.13 $\pm$ 0.13 <sup>a</sup>  | 12.31 $\pm$ 0.06 <sup>c</sup> | 38.62 $\pm$ 0.12 <sup>b</sup>  |
|                 | 80:20 | 33.96 $\pm$ 0.17 <sup>b</sup>  | 19.14 $\pm$ 0.06 <sup>c</sup>  | 10.47 $\pm$ 0.13 <sup>b</sup> | 36.44 $\pm$ 0.37 <sup>a</sup>  |

The values are mean  $\pm$  SD, calculated from triplicate measurements. Values with different letters in the

same system (a-c) are significantly different at  $p < 0.05$ .
